# Supplementary material for: Investigation of the electronic and optical properties of Al13–dianhydride complexes by (time-dependent) density functional theory
Source: Royal Society of Chemistry journal article supplement (doi:10.1039/d4nj03342f), 2024-01-01
Supplement: d4nj03342f1.pdf [file d4nj03342f1.pdf]

## Supplementary Information

### **Investigation of the electronic and optical properties of Al<sub>13</sub>- dianhydride complexes by (time-dependent) density functional theory**

Yan Yan, Yu Yang and Na Hou\*

*Key Laboratory of Magnetic Molecules and Magnetic Information Materials of*

*Ministry of Education & School of Chemistry and Materials Science of Shanxi*

*Normal University, Taiyuan 030032, China*

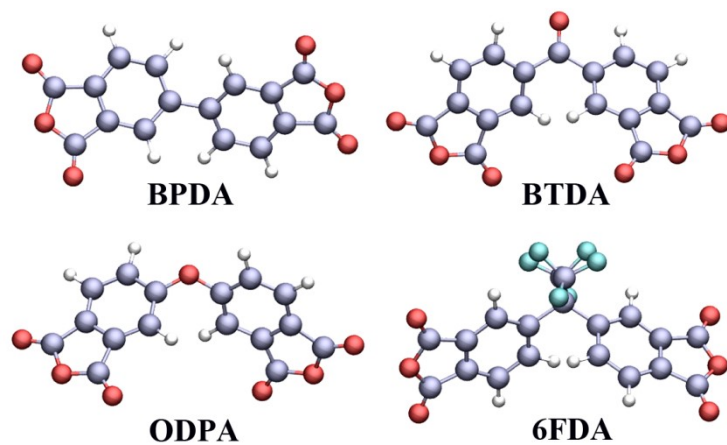

**Fig. S1** Structures of the BPDA, BTDA, ODPA, and 6FDA calculated at the PBE1PBE-D3/def2-SVP level of theory.

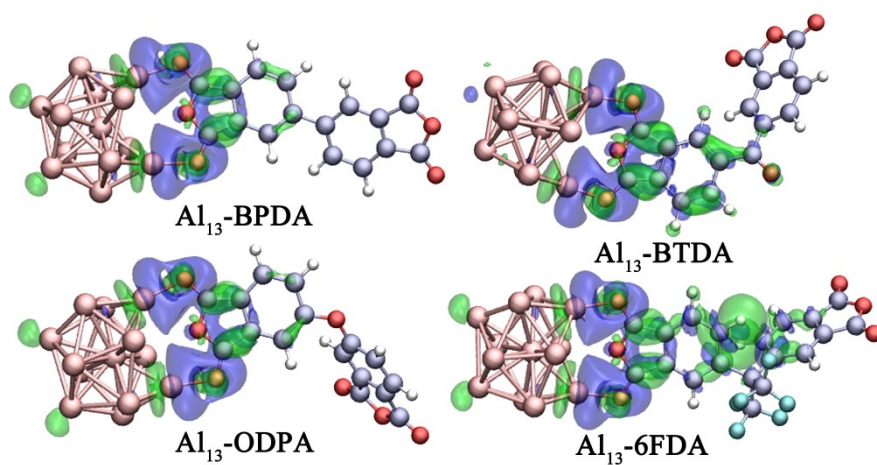

**Fig. S2** Charge density difference maps of Al<sub>13</sub>-X, with the isosurface value of 0.002 a.u.

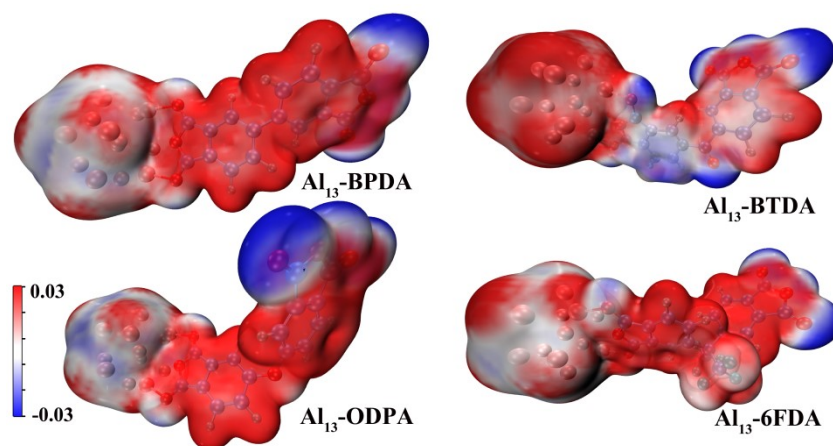

**Fig. S3** Electrostatic potential maps (ESP) for the  $\text{Al}_{13}\text{-X}$  ( $\text{X} = \text{BPDA}$ ,  $\text{BTDA}$ ,  $\text{ODPA}$ , and  $6\text{FDA}$ ), where the blue region denotes the negative, while the red region represents the positive counterpart.

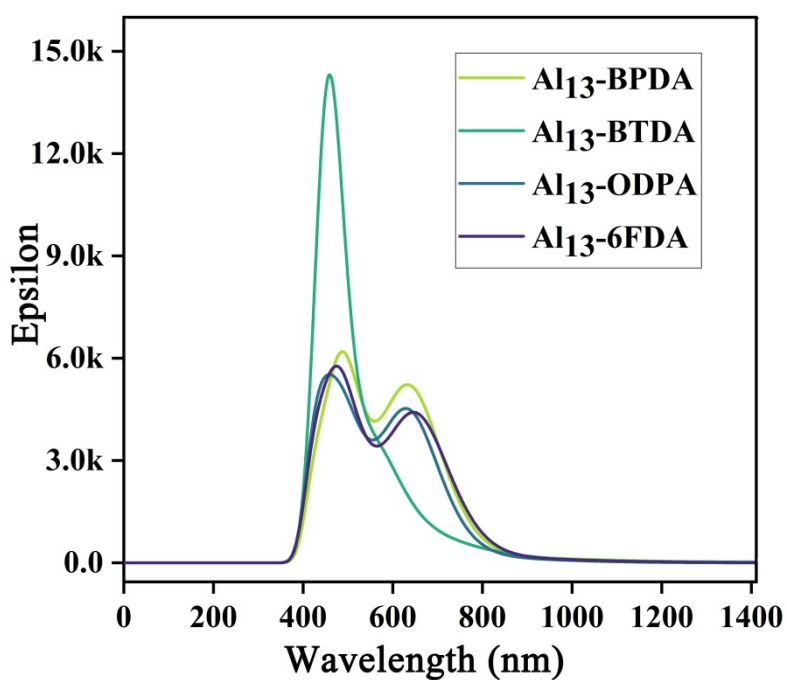

**Fig. S4** Simulated UV-vis absorption spectrum of the  $\text{Al}_{13}\text{-X}$  ( $\text{X} = \text{BPDA}$ ,  $\text{BTDA}$ ,  $\text{ODPA}$ , and  $6\text{FDA}$ ) calculated at the TD-CAM-B3LYP/6-31+G(d) level.

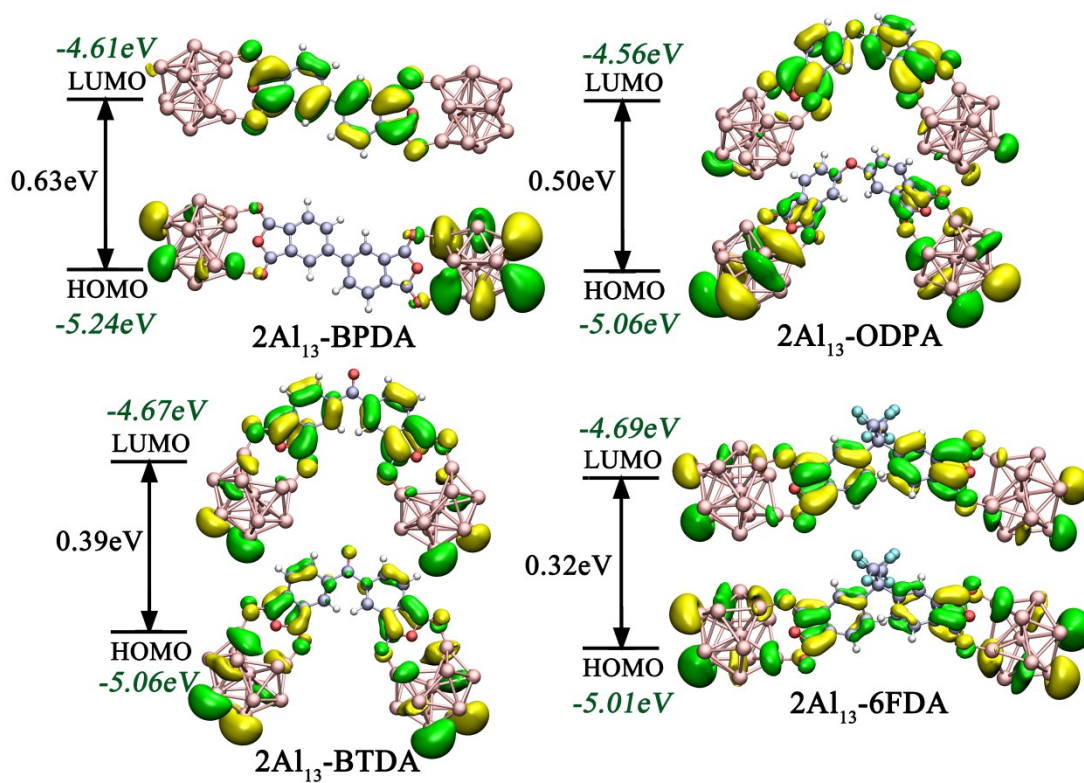

**Fig. S5** HOMOs and LUMOs of the studied molecules. Frontier molecular orbital energies (in eV) and HOMO-LUMO gap (in eV) are given.

**Table S1** The components of polarizability (in a.u.), isotropic average polarizability ( $\alpha_{\text{iso}}$ , in a.u.), anisotropic polarizability ( $\alpha_{\text{aniso}}$ , in a.u.), components of the first hyperpolarizability (in a.u.), and total first hyperpolarizability ( $\beta_{\text{tot}}$ , in a.u.)

|                         | Al <sub>13</sub> -BPDA | Al <sub>13</sub> -BTDA | Al <sub>13</sub> -ODPA | Al <sub>13</sub> -6FDA |
|-------------------------|------------------------|------------------------|------------------------|------------------------|
| $\alpha_{xx}$           | 1042                   | 885                    | 899                    | 1029                   |
| $\alpha_{yy}$           | 673                    | 700                    | 722                    | 667                    |
| $\alpha_{zz}$           | 618                    | 631                    | 649                    | 690                    |
| $\alpha_{\text{iso}}$   | 778                    | 739                    | 757                    | 795                    |
| $\alpha_{\text{aniso}}$ | 399                    | 227                    | 221                    | 351                    |
| $\beta_{xxx}$           | -10995                 | -3591                  | -3550                  | -7333                  |
| $\beta_{yyy}$           | 142                    | 360                    | -9                     | 102                    |
| $\beta_{zzz}$           | 148                    | 97                     | -194                   | 55                     |
| $\beta_X$               | -9133                  | -2780                  | -2264                  | -5617                  |
| $\beta_Y$               | 150                    | 2496                   | 243                    | 280                    |
| $\beta_Z$               | -338                   | -545                   | 293                    | -504                   |
| $\beta_{\text{tot}}$    | 9141                   | 3775                   | 2297                   | 5646                   |

**Table S2** Frontier molecular orbital energies ( $E_{\text{H}}$  and  $E_{\text{L}}$ , in eV), HOMO-LUMO gap ( $E_{\text{gap}}$ , in eV), isotropic average polarizability ( $\alpha_{\text{iso}}$ , in a.u.), and total first hyperpolarizability ( $\beta_{\text{tot}}$ , in a.u.), excitation energy ( $\Delta E$ , in eV), and oscillator strength ( $f_{\text{os}}$ ) of BPDA, BTDA, ODPA, 6FDA, and Al<sub>13</sub>

|                       | BPDA  | BTDA  | ODPA  | 6FDA  | Al <sub>13</sub>  |
|-----------------------|-------|-------|-------|-------|-------------------|
| $E_{\text{H}}$        | -8.23 | -8.49 | -7.92 | -8.79 | -5.94             |
| $E_{\text{L}}$        | -3.11 | -3.60 | -3.02 | -3.21 | -3.03             |
| $E_{\text{gap}}$      | 4.92  | 4.89  | 4.90  | 5.58  | 2.91 <sup>a</sup> |
| $\alpha_{\text{iso}}$ | 203   | 210   | 202   | 230   | 518               |
| $\beta_{\text{tot}}$  | 11    | 88    | 427   | 346   | 0                 |
| $\Delta E$            | 5.72  | 4.90  | 4.49  | 6.02  | 2.15              |
| $f_{\text{os}}$       | 0.977 | 0.232 | 0.210 | 1.598 | 0.011             |

<sup>a</sup>HOMO-LUMO gap of alpha orbital

**Table S3** The components of polarizability (in a.u.), isotropic average polarizability ( $\alpha_{\text{iso}}$ , in a.u.), components of the first hyperpolarizability (in a.u.), and total first hyperpolarizability ( $\beta_{\text{tot}}$ , in a.u.) of  $2\text{Al}_{13}\text{-X}$  (X = BPDA, BTDA, ODPA, and 6FDA)

|                       | $2\text{Al}_{13}\text{-BPDA}$ | $2\text{Al}_{13}\text{-BTDA}$ | $2\text{Al}_{13}\text{-ODPA}$ | $2\text{Al}_{13}\text{-6FDA}$ |
|-----------------------|-------------------------------|-------------------------------|-------------------------------|-------------------------------|
| $\alpha_{xx}$         | 4409                          | 5866                          | 5518                          | 10421                         |
| $\alpha_{yy}$         | 1144                          | 2078                          | 1695                          | 1266                          |
| $\alpha_{zz}$         | 1104                          | 1063                          | 1110                          | 1143                          |
| $\alpha_{\text{iso}}$ | 2220                          | 3003                          | 2775                          | 4277                          |
| $\beta_{xxx}$         | 125464                        | -21                           | -351420                       | 22468                         |
| $\beta_{xxy}$         | -963                          | -83024                        | -488612                       | -53303                        |
| $\beta_{xyy}$         | -107                          | -2                            | -9596                         | -5903                         |
| $\beta_{yyy}$         | 89                            | 3072                          | -72113                        | 4683                          |
| $\beta_{xxz}$         | 39703                         | -5                            | 28590                         | 25359                         |
| $\beta_{xyz}$         | 583                           | 6912                          | 24714                         | 1608                          |
| $\beta_{yyz}$         | -323                          | 2                             | 3049                          | -146                          |
| $\beta_{xzz}$         | 662                           | 2                             | -1583                         | -527                          |
| $\beta_{yzz}$         | -79                           | 3532                          | 1557                          | 1291                          |
| $\beta_{zzz}$         | -345                          | 0.6                           | 57                            | -1695                         |
| $\beta_{\text{tot}}$  | 131930                        | 76420                         | 667196                        | 55230                         |

## Cartesian Coordinates

### 1. Al<sub>13</sub>-BPDA

C 1.53746300 1.48349100 -0.38547400  
C 1.78517200 0.10670600 -0.05799200  
C 3.09091700 -0.40054500 -0.01742000  
C 4.15070300 0.45590700 -0.29778500  
C 3.89025400 1.82391600 -0.61905000  
C 2.61338400 2.34257400 -0.66904200  
C 0.13566100 1.66789800 -0.35197000  
C 0.52132600 -0.49471700 0.16562100  
H 3.26266500 -1.44274700 0.25814200  
H 4.73367900 2.47391200 -0.86078900  
H 2.43802200 3.38772400 -0.93001500  
O -0.41684100 0.47170800 -0.00838700  
O 0.05964600 -1.63548900 0.43824200  
O -0.69719200 2.59234700 -0.55894000  
C 8.14786600 -1.01401300 -0.19739500  
C 7.85918900 0.26567700 0.25523400  
C 6.57441300 0.78133400 0.23646000  
C 5.54463300 -0.03762300 -0.25967600  
C 5.85414100 -1.33587200 -0.72060400  
C 7.15182900 -1.84287900 -0.69558800

C 9.60527300 -1.22884500 -0.03054200  
C 9.13266100 0.87261800 0.71865400  
H 6.37639000 1.78350600 0.62216900  
H 5.05270000 -1.95225700 -1.13422400  
H 7.38122900 -2.84569300 -1.06129000  
O 10.12198800 -0.06812700 0.51813300  
O 9.34736500 1.94689100 1.17999200  
O 10.28023000 -2.17267800 -0.28672100  
Al -5.77112400 0.39812200 2.11290500  
Al -3.12212400 1.11617400 2.17945700  
Al -4.97319700 2.41690800 0.46534700  
Al -6.65237500 0.74465500 -0.64921900  
Al -6.16935400 -1.84760600 0.88519000  
Al -3.69840600 -1.58285500 2.28764800  
Al -2.53123700 2.03369400 -0.39244300  
Al -4.31155200 1.31205800 -2.18175500  
Al -5.58763200 -1.24463800 -1.92184000  
Al -4.08784200 -2.86718000 -0.33290300  
Al -1.87072100 -1.69212500 0.41024000  
Al -2.85420200 -1.03285600 -2.11864600  
Al -4.09142900 -0.15092200 0.05654700



## 2. Al<sub>13</sub>-BTDA

C -8.14103300 -2.49001800 0.29428000

C -7.50287000 -1.15971600 0.44497300

C -6.43657100 -1.10620500 -0.44221400

C -6.39362500 -2.39878300 -1.16744300

C -7.02107100 1.05055800 1.16001700

C -5.91807300 1.10255500 0.28647400

C -7.82208100 -0.08437400 1.26467800

C -5.62188900 0.01227800 -0.54395700

O -9.07716500 -2.96455900 0.85313800

O -5.65177200 -2.78588600 -2.01237500

O -7.43100500 -3.17033900 -0.67755200

H -8.66950000 -0.13073100 1.95152900

H -4.79873600 0.04282600 -1.26020300

C 0.43429200 2.43779500 -0.48953800

C -0.91535400 2.65976200 -0.40525000

C -1.51128800 1.41530600 0.09986400

C -0.47148400 0.53001400 0.29157900

C -3.10824300 3.64333800 -0.48248600

C -3.70249900 2.40356600 -0.02266300

C -1.76881100 3.77409600 -0.68204400

C -2.91361600 1.31478200 0.27617400

O 1.52853800 3.06980800 -0.85819100  
O -0.28754800 -0.70675600 0.68893600  
O 0.67496600 1.15978000 -0.06252700  
H -1.34130500 4.71251100 -1.04095800  
H -3.33837600 0.38993100 0.67109900  
C -5.16420800 2.40559600 0.20986100  
O -5.78616800 3.44335200 0.34185300  
H -3.78826200 4.47740900 -0.66335300  
H -7.23625800 1.94167300 1.75388700  
Al 3.08821800 2.21540900 -0.79806700  
Al 4.50377400 0.70874800 -2.36409400  
Al 2.40651200 -1.05650500 -2.10471800  
Al 1.40597300 -1.28784900 0.59669200  
Al 3.01171800 0.67174600 2.37012300  
Al 4.99578300 1.92183800 0.93998400  
Al 5.05647700 -1.87849600 -1.90480100  
Al 3.12080300 -3.03908600 -0.34880200  
Al 3.38387200 -2.01108500 2.21560700  
Al 5.61531800 -0.36890200 2.16111300  
Al 6.41973400 0.06034400 -0.48938800  
Al 5.58336000 -2.41931100 0.59519200  
Al 3.81493600 -0.35224300 0.04253500

### 3. Al<sub>13</sub>-ODPA

C -8.49492900 -2.12335600 -0.28046900

C -7.73263100 -0.87443300 -0.50769500

C -6.76733900 -0.78632500 0.48633100

C -6.91348900 -1.98226500 1.35638800

C -6.97486900 1.18396700 -1.42166200

C -6.00072300 1.26166700 -0.41356700

C -7.86015500 0.11059600 -1.47946200

C -5.88057100 0.27384800 0.57159100

O -9.40423000 -2.59419500 -0.88315800

O -6.29766800 -2.30621100 2.32000400

O -7.95226000 -2.72742700 0.84237900

H -8.62153300 0.04076200 -2.25881700

H -5.13546000 0.33464100 1.36693100

C 0.21100400 2.33896100 0.54419200

C -1.17992800 2.55280100 0.40296000

C -1.72669400 1.36474100 -0.19258800

C -0.64543500 0.47299300 -0.39082800

C -3.36300700 3.52254500 0.44224700

C -3.89620800 2.34143400 -0.14301100

C -2.01812600 3.63850100 0.71533300

C -3.09816800 1.25869100 -0.47528300

O 1.21967200 2.96609200 0.96792100  
O -0.45631700 -0.68849200 -0.84932500  
O 0.47619900 1.09693300 0.06261900  
H -1.61082700 4.54496800 1.16658900  
H -3.50868600 0.36225700 -0.94179600  
O -5.22994000 2.38393100 -0.40409000  
H -4.05934600 4.33213400 0.66643700  
H -7.01532700 1.99297400 -2.15330300  
Al 4.90875900 -2.18706400 1.72102800  
Al 2.30124800 -1.33317200 1.87966300  
Al 3.17846700 -3.06807400 -0.18806900  
Al 5.53459600 -2.40618800 -1.12323700  
Al 6.51750000 -0.33655800 0.88402700  
Al 4.27446500 0.51779900 2.42923700  
Al 1.37748800 -1.25868700 -0.75851200  
Al 3.31589800 -1.28305700 -2.52582100  
Al 5.78429100 0.04733300 -1.91880700  
Al 5.37917600 1.87436200 0.06025900  
Al 2.86345300 1.97844300 0.77124100  
Al 3.39706900 1.41049700 -1.91632400  
Al 3.87183400 -0.41555400 -0.05189400

#### 4. Al<sub>13</sub>-6FDA

C -8.34784900 2.90554800 0.82760900

C -7.17888000 1.99526300 0.72737300

C -7.55386100 0.91926700 -0.06085600

C -8.96530600 1.13398300 -0.46866000

C -5.02193200 1.04177400 0.97493800

C -5.39131600 -0.05290600 0.16809500

C -5.90482000 2.07913600 1.26881500

C -6.68999300 -0.12569400 -0.35120600

O -8.46945500 3.93951200 1.39978800

O -9.68006600 0.46626600 -1.14275600

O -9.36761600 2.32948500 0.09523500

H -5.60739400 2.92118900 1.89651500

H -7.03824300 -0.95787900 -0.96133200

C 0.85461000 0.93347800 -1.15510900

C -0.51220100 0.58689100 -1.02887700

C -0.58079300 -0.50895900 -0.10566000

C 0.74814600 -0.79154500 0.29682400

C -2.88763600 0.50598300 -1.24550500

C -2.96624300 -0.57638600 -0.31711200

C -1.69064200 1.08805800 -1.60610200

C -1.80839600 -1.09443400 0.23991800

O 1.55950400 1.77051200 -1.78089400  
O 1.34405700 -1.59289400 1.06431300  
O 1.55576900 0.08719800 -0.35175900  
H -1.65861400 1.91390000 -2.31862000  
H -1.81735500 -1.93621500 0.93021000  
C -4.39337900 -2.02861400 1.25237800  
F -5.64058200 -2.34934100 1.56816500  
F -3.70464700 -3.16276400 1.12506100  
F -3.87529400 -1.35296600 2.27811600  
C -4.68994000 -2.07741900 -1.25204200  
F -3.67979500 -2.89123700 -1.52613000  
F -5.76776700 -2.83047900 -1.03648400  
F -4.92193300 -1.33638600 -2.33583600  
C -4.35369700 -1.16460500 -0.03898100  
H -4.01022600 1.07743300 1.38326400  
H -3.81051300 0.88538000 -1.68663900  
Al 3.25319600 -1.31317600 1.13128300  
Al 5.27399900 -2.46696000 -0.07472900  
Al 5.46522900 -1.05383300 2.50568400  
Al 3.85331800 1.24292900 2.08508500  
Al 3.44643200 1.59971800 -1.42155700  
Al 4.42373500 -0.89990300 -2.18549100

AI 7.56754100 -1.10809600 0.94857600

AI 6.59505500 1.39382200 2.11599400

AI 5.05245100 2.88133200 0.20815200

AI 5.92898700 1.50793300 -2.24410100

AI 7.10365400 -0.85980000 -1.58687500

AI 7.61037500 1.69497600 -0.24704600

AI 5.25062400 0.21115000 0.07842100
